# Supplementary material for: Multiple supporting cell subtypes are capable of spontaneous hair cell regeneration in the neonatal mouse cochlea
Source: Oxford University Press journal article supplement (doi:10.1242/dev.171009), 2019-02-15
Supplement: dev171009supp.pdf [file dev171009supp.pdf]

**Table S1. Primary antibodies used for immunostaining and special staining procedures.**

| Protein                   | Host   | Dilution | Special procedures                            | Vendor/catalog number        |
|---------------------------|--------|----------|-----------------------------------------------|------------------------------|
| <b>BrdU</b>               | Mouse  | 1:20     | Conjugated primary AB                         | Invitrogen #B35130           |
| <b>Myosin VIIa</b>        | Rabbit | 1:200    | None                                          | Proteus Biosciences #25-6790 |
| <b>p27<sup>Kip1</sup></b> | Mouse  | 1:400    | AUM, SE, 37°C AB incubation, & IgG1 secondary | Fisher #BDB610242            |
| <b>RFP</b>                | Mouse  | 1:200    | SE, 37°C AB incubation, & IgG2a secondary     | Rockland #200-301-379S       |
| <b>S100a1</b>             | Rabbit | 1:100    | 37°C AB incubation                            | Abcam #AB868                 |
| <b>Sox2</b>               | Goat   | 1:400    | None                                          | Santa Cruz #sc-17320         |

AB, antibody; AUM, antigen unmasking solution; SE, signal enhancer.

**Table S2. Secondary antibodies used for immunostaining**

| Antibody                        | Dilution | Vendor/Catalog number |
|---------------------------------|----------|-----------------------|
| Alexa 488 donkey anti-goat      | 1:1000   | Invitrogen #A11055    |
| Alexa 488 donkey anti-rabbit    | 1:1000   | Invitrogen #A21206    |
| Alexa 546 donkey anti-rabbit    | 1:1000   | Invitrogen #A10040    |
| Alexa 568 goat anti-mouse IgG2a | 1:1000   | Invitrogen #A21134    |
| Alexa 647 donkey anti-goat      | 1:1000   | Invitrogen #A21447    |
| Alexa 647 goat anti-mouse IgG1  | 1:1000   | Invitrogen #A21240    |
| Alexa 647 donkey anti-rabbit    | 1:1000   | Invitrogen #A31573    |
